# Supplementary material for: Fine-tuning of IPA1 transactivation activity by E3 ligase IPI7-mediated non-proteolytic K29-ubiquitination during Magnaporthe oryzae infection
Source: PubMed Central journal article supplement — Nat Commun. 2024 Sep 1;15:7608. doi: 10.1038/s41467-024-51962-x (PMC11366762; doi:10.1038/s41467-024-51962-x), 2024-09-01
Supplement: 41467_2024_51962_MOESM1_ESM.pdf [file 41467_2024_51962_MOESM1_ESM.pdf]

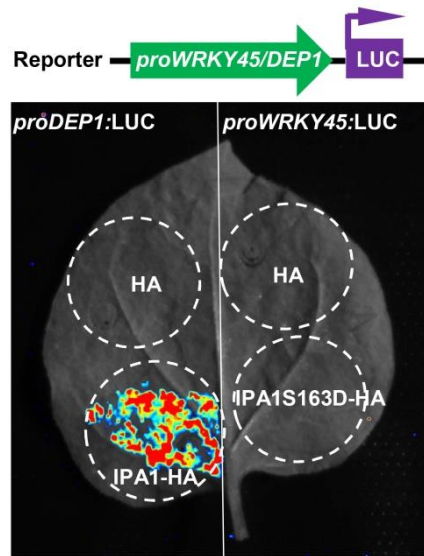

1 **Supplementary Fig. 1. IPA1 alone activates *proDEP1:LUC* , but IPA1(S163D)**  
 2 **alone is unable to activate *proWRKY45:LUC* expression.** Transactivation of  
 3 *proDEP1:LUC* by IPA1 and *proWRKY45:LUC* by IPA1(S163D) in tobacco leaves. *A.*  
 4 *tumefaciens* carrying indicated plasmids were infiltrated into tobacco leaves. The  
 5 luciferase (LUC) reporter is driven by *DEP1* (*proDEP1:LUC*) or *WRKY45* promoter  
 6 (*proWRKY45:LUC*). IPA1 or IPA1(S163D) fused with an HA tag is driven by CaMV  
 7 35S promoter. D-luciferin was applied as the LUC substrate. Visible lights indicate  
 8 that IPA1-HA activates expression of LUC driven by *DEP1*, which serves as a  
 9 positive control.

10

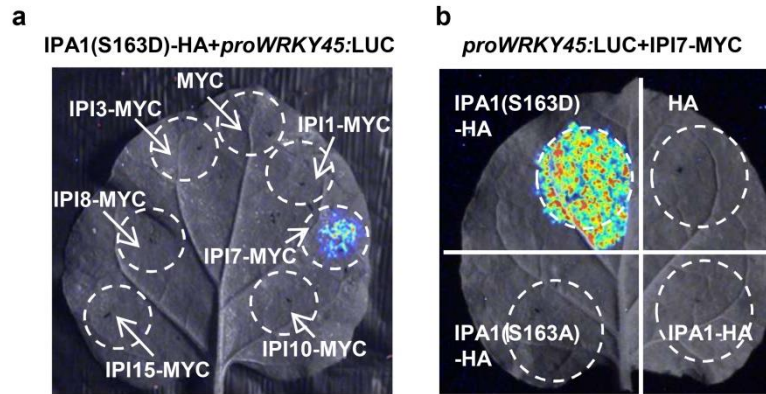

11 **Supplementary Fig. 2. Determination of co-activators of IPA1(S163D) for**  
 12 **transactivation of *WRKY45* promoter.** **a** Each candidate co-activator was  
 13 individually combined with IPA1(S163D) to test for their cooperative transactivation  
 14 of *WRKY45* in an *A. tumefaciens*-mediated infiltration of tobacco leaves. **b**  
 15 Transactivation assay of *proWRKY45*:LUC by IPA1(S163D) and IPA1(S163A) in  
 16 the presence of IPI7-MYC. *A. tumefaciens* carrying indicated plasmids were  
 17 infiltrated into tobacco leaves. The LUC reporter was driven by the *WRKY45*  
 18 promoter (*proWRKY45*:LUC). D-luciferin was applied as the LUC substrate.  
 19

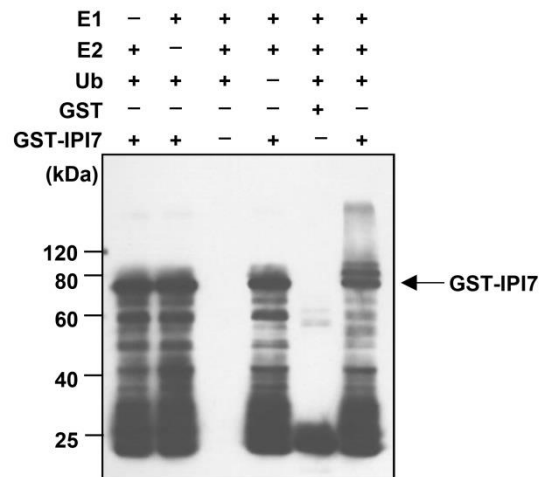

20 **Supplementary Fig. 3. IPI7 is a functional E3 ubiquitin ligase.** The E3 ubiquitin  
 21 ligase activity of IPI7 was examined with purified GST-IPI7 protein in an *in vitro*  
 22 assay. Immunoblotting was performed with a GST monoclonal antibody. Bands above  
 23 the GST-IPI7 band represent ubiquitinated forms of GST-IPI7. The presence (+) or  
 24 absence (-) of components in the reaction mixture is indicated.  
 25

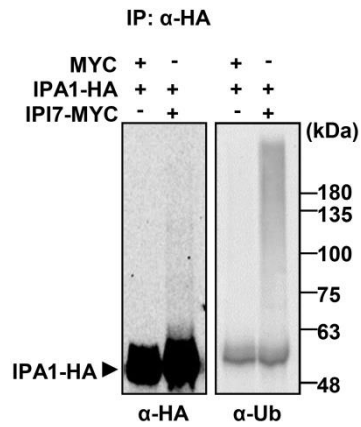

26 **Supplementary Fig. 4. IPI7 promotes ubiquitination of IPA1.** Enhanced  
 27 ubiquitination of IPA1-HA with added IPI7-MYC in tobacco leaves. *A. tumefaciens*  
 28 carrying indicated plasmids were infiltrated into tobacco leaves. Immunoprecipitation  
 29 was performed with a HA antibody and immunoblotting was conducted with an HA  
 30 antibody or a Ub antibody.  
 31

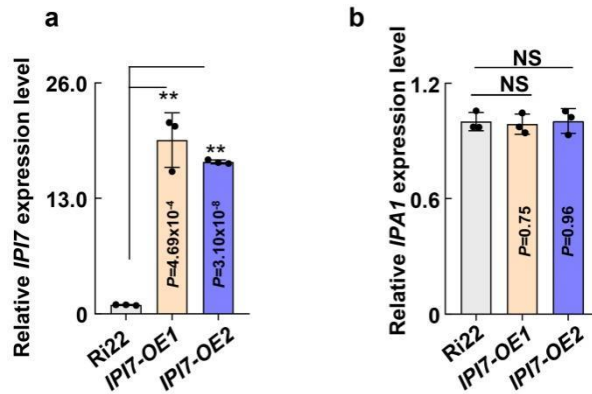

32 **Supplementary Fig. 5. *IPI7* and *IPA1* RNA levels in *IPI7-OE* transgenic plants. **a****  
 33 Transcript levels of *IPI7* in Ri22 and ubiquitin promoter-driven *IPI7*-overexpressing  
 34 transgenic plants (*IPI7-OE-1* and *IPI7-OE-2*) were determined by RT-qPCR. **b**  
 35 Transcript levels of *IPA1* in Ri22, *IPI7-OE-1* and *IPI7-OE-2* plants were determined  
 36 by RT-qPCR. Rice *ubiquitin5* was used as the reference (Supplementary Data 1).  
 37 Each value represents mean  $\pm$  SD ( $n = 3$  independent biological samples). Two-tailed  
 38 *t*-test, \*\* indicates  $P < 0.01$ . NS indicates no significant differences between the  
 39 compared pair.

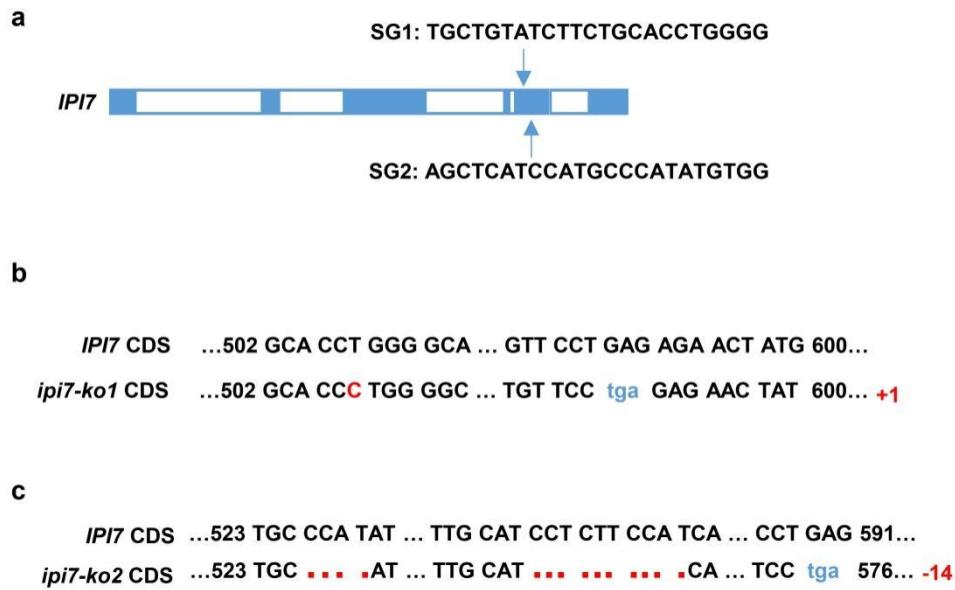

40 **Supplementary Fig. 6. Generation of *IPI7* knockout plants by the CRISPR/Cas9**  
 41 **technology. a** Schematic map of the genomic region of *IPI7* and the sgRNA target  
 42 sites (SG1 and SG2). Arrows indicate the sgRNA target sites on the *IPI7* genomic  
 43 sequence. Blue boxes indicate exons of *IPI7* and white boxes indicate introns. **b, c**  
 44 Sequence alignment of the sgRNA target regions comparing wild-type with *ipi7-ko1*  
 45 **(b)** and *ipi7-ko2* **(c)** mutants. The inserted or deleted bases are shown in red; the new  
 46 stop codons introduced in *ipi7-ko* because of indels are marked in blue.  
 47

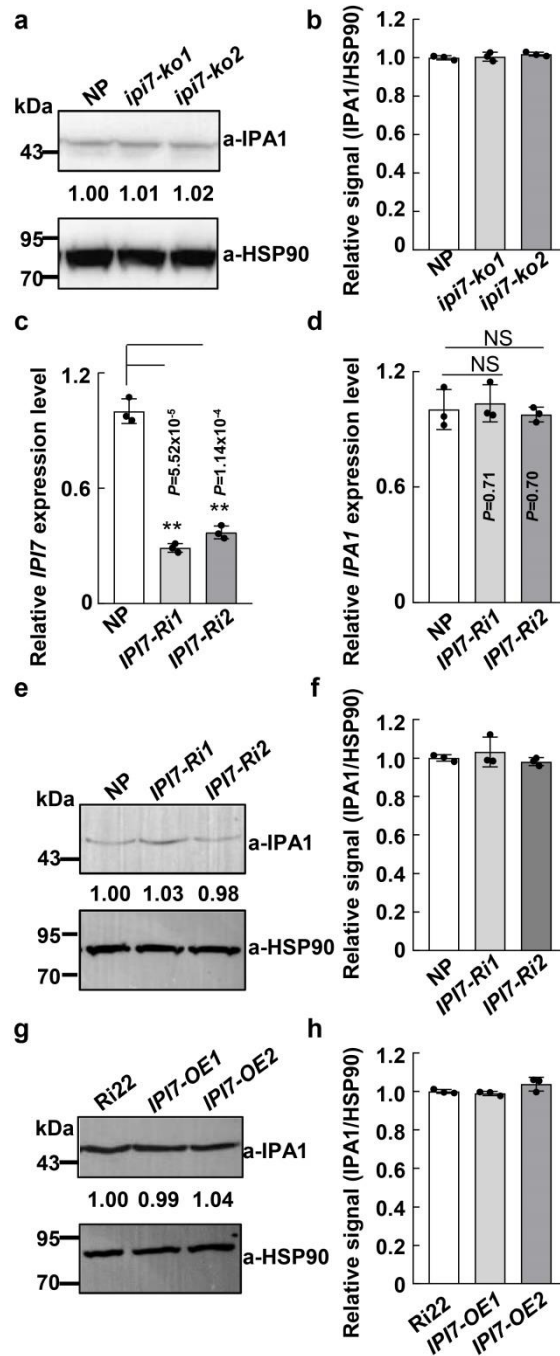

48 **Supplementary Fig. 7. Stability of IPA1 protein is not affected by IPI7. a-b.** The  
 49 abundance of IPA1 protein in Nipponbare (NP) and *ipi7-ko* plants was compared (a).  
 50 Statistical analysis of the protein bands in condition a was conducted using three  
 51 independent assays (b). **c-d.** Transcript levels of *IPI7* (c) and *IP1A1* (d) in NP and *IPI7*  
 52 RNA interference (*IPI7-Ri*) plants were determined by RT-qPCR. Each value  
 53 represents mean  $\pm$  SD (n = 3 independent biological samples). Two-tailed *t*-test, \*\*  
 54 indicates  $P < 0.01$ . NS indicates no significant differences between the compared pair.  
 55 **e-f.** IPA1 protein levels in NP and *IPI7-Ri* plants. **g-h.** IPA1 protein levels in Ri22 and

56 *IPI7-OE* plants. Samples were collected from indicated plants. IPA1 protein was  
57 probed in immunoblots with an IPA1 antibody and quantitated by densitometry with  
58 normalization to Heat Shock Protein 90 (HSP90). Each value represents mean  $\pm$  SD  
59 (n = 3 independent biological samples). Statistical analysis of protein bands was  
60 conducted using three independent assays.



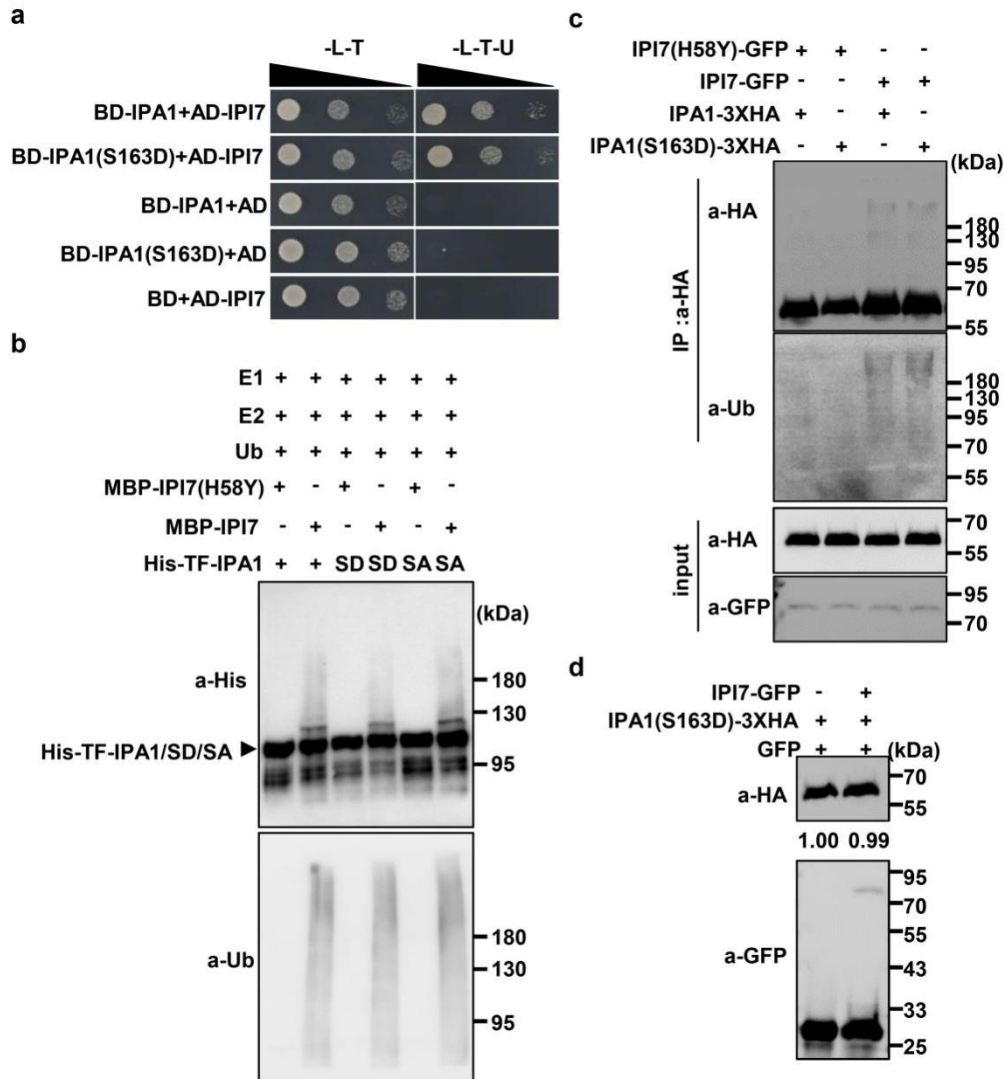

61 **Supplementary Fig. 8. IPI7 interacts with and ubiquitinates IPA1(S163D).** **a**  
 62 Interaction between IPI7 and IPA1(S163D) in yeast cells. Wild type IPA1 and  
 63 IPA1(S163D) proteins were individually fused with the GAL4 binding domain to  
 64 generate BD-IPA1 and BD-IPA1(S163D), respectively, and IPI7 with the GAL4  
 65 activation domain to form AD-IPI7. Yeast clones growing on SD-L-T-U medium  
 66 indicate protein interaction in cells. **b** *In vitro* ubiquitination of IPA1 (His-TF-IPA1),  
 67 IPA1(S163D) [His-TF-IPA1-(S163D)] and IPA1(S163A) [His-TF-IPA1-(S163A)] by  
 68 IPI7. MBP-IPI7(H58Y) was used as a negative control. Immunoblotting was  
 69 performed with antibodies against His and Ub separately. **c.** *In vivo* ubiquitination of  
 70 IPA1 and IPA1(S163D) by IPI7 in tobacco leaves. IPI7(H58Y)-GFP was used as a  
 71 negative control. *A. tumefaciens* carrying indicated plasmids were infiltrated into  
 72 tobacco leaves. Immunoprecipitation was performed with an HA antibody and  
 73 immunoblotting was conducted with an HA, GFP or Ub antibody. **d.** Stability of

74 IPA1(S163D) protein in the presence or absence of IPI7 *in vivo*. *A. tumefaciens*  
75 carrying indicated constructs were co-infiltrated into tobacco leaves. GFP was used as  
76 an internal control for protein expression. The presence (+) or absence (-) of proteins  
77 expressed in leaves is indicated.

78

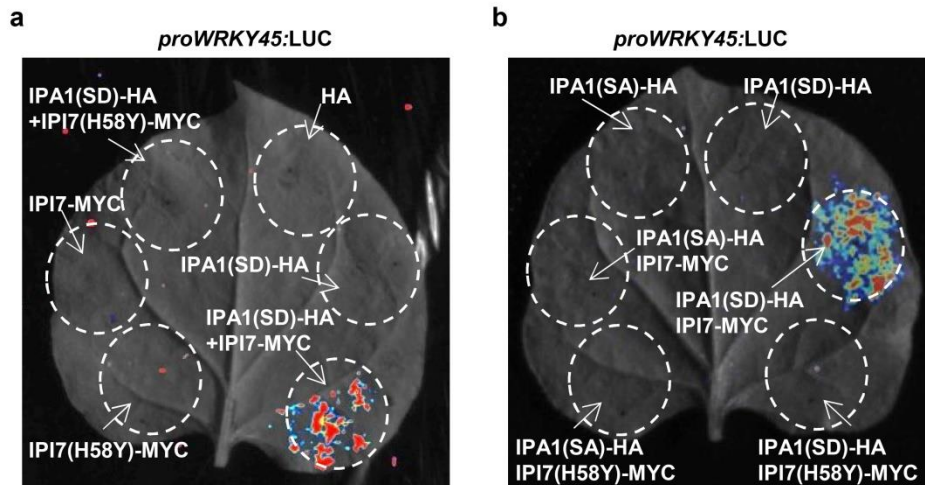

79 **Supplementary Fig. 9. Effects of IPA1(S163D) and IPA1(S163A) on**  
 80 **transactivation of *WRKY45* promoter.** **a** The transactivation of *proWRKY45:LUC*  
 81 was analyzed by co-expressing it with IPA1(SD)-HA and IPI7-MYC in tobacco leaves.  
 82 **b** Co-expression of IPA1(SA)-HA and IPI7-MYC failed to activate the transactivation  
 83 of *proWRKY45:LUC*. *A. tumefaciens* carrying indicated plasmids were infiltrated into  
 84 tobacco leaves. The LUC reporter was driven by the *WRKY45* promoter. D-luciferin  
 85 was applied as the LUC substrate. IPA1(SD) is IPA1(S163D); IPA1(SA) is  
 86 IPA1(S163A). IPI7(H58Y) is a null mutant of IPI7.  
 87

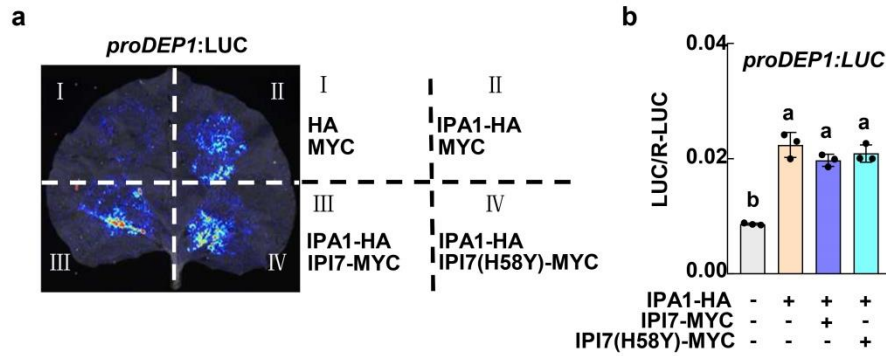

88 **Supplementary Fig. 10. IPI7 does not affect transactivation of *DEP1* promoter by**  
 89 **IPA1 in tobacco leaves. a** Transactivation of *DEP1* by IPA1 with or without IPI7 in  
 90 tobacco leaves. *A. tumefaciens* carrying indicated plasmids were infiltrated into  
 91 tobacco leaves. The LUC reporter is driven by *DEP1* promoter (*proDEP1:LUC*).  
 92 D-luciferin was applied as the LUC substrate. **b** Statistical analysis of (a). Each value  
 93 represents mean  $\pm$  SD (n = 3 independent biological samples). Renilla LUC was used  
 94 as the internal reference. Different letters indicate significant differences determined  
 95 by the Tukey-Kramer test,  $P < 0.05$  (one-way ANOVA was conducted, followed by  
 96 two-sided HSD test for multiple comparisons). The corresponding  $P$ -values can be  
 97 found in the Source Data. Source data are provided as a Source Data file.  
 98

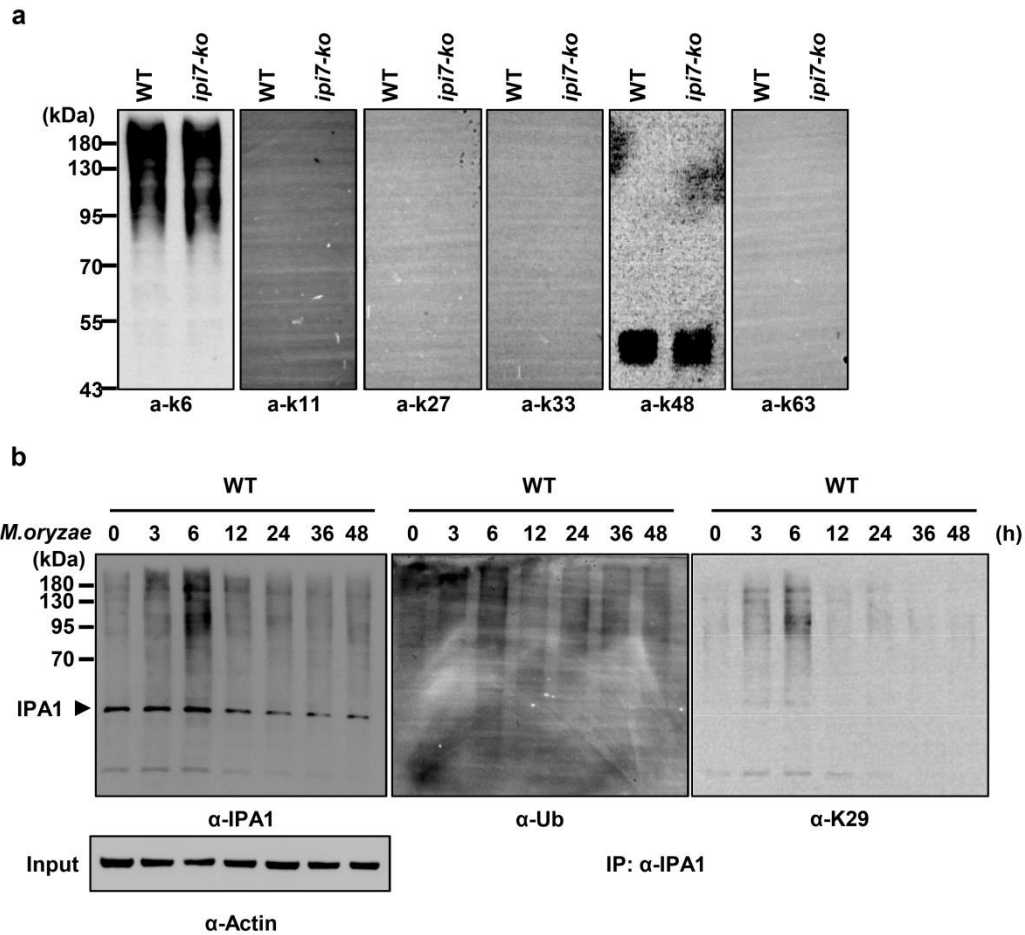

99 **Supplementary Fig. 11. Detection of IPI7-mediated polyubiquitination of IPA1.**  
 100 The *in vivo* ubiquitination assay was performed with wild type and *ipi7-ko* plants.  
 101 Immunoprecipitation was performed with an IPA1 antibody; precipitated proteins  
 102 were separated on a gel, blotted, and probed with an antibody against K6, K11, K27,  
 103 K33, K48, or K63-polyubiquitin chain. **b.** Levels of K29-polyubiquitination of IPA1  
 104 upon *M. oryzae* infection. Leaves were collected at different time points after  
 105 inoculation with *M. oryzae*. Immunoprecipitation was performed with an IPA1  
 106 antibody and immunoblotting was performed with an antibody against IPA1, Ub or  
 107 K29. Proteins before immunoprecipitation (input) were probed with an antibody  
 108 against actin for internal reference.  
 109

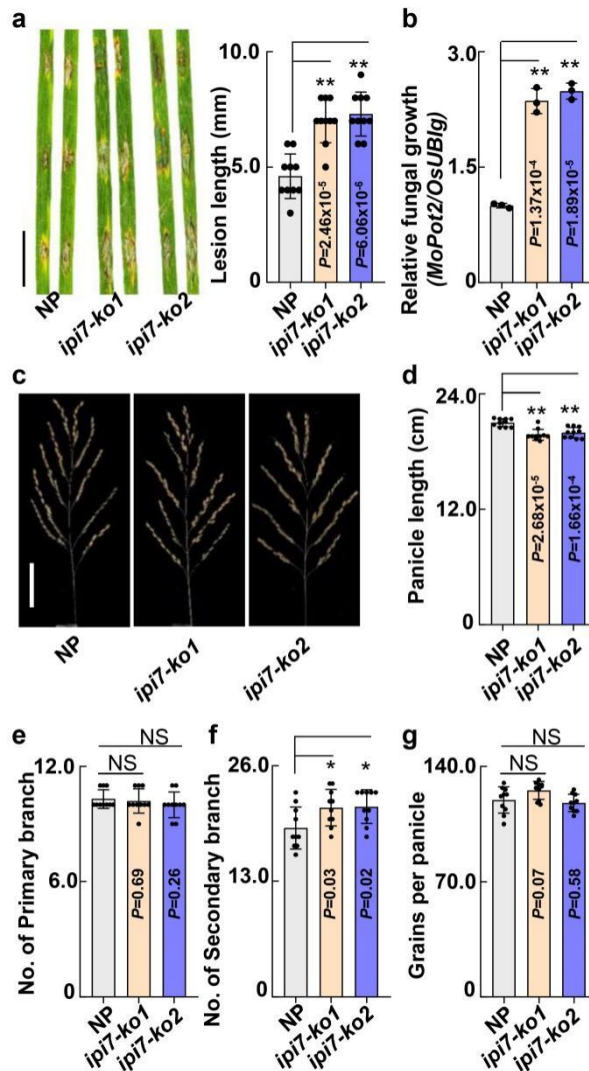

110 **Supplementary Fig. 12. Knockout of *IPI7* impairs host resistance to blast disease**  
 111 **without panicle morphology change. a, b** Disease phenotypes of *ipi7-ko* plants after  
 112 *M. oryzae* infection. NP and *ipi7-ko* plants were inoculated with *M. oryzae*. Lesion  
 113 pictures and average lesion length (**a**), and *M. oryzae* biomass in infected leaves  
 114 determined by the *MoPot2* DNA content (**b**) are presented. Each value represents  
 115 mean  $\pm$  SD (n = 10 lengths of independent lesions are measured; n = 3 independent  
 116 biological samples of *M. oryzae*). Two-tailed *t*-test, \*\* indicates  $P < 0.01$ . **c**  
 117 Morphology of main panicles of NP and *ipi7-ko*. Bar = 5 cm. **d-g** Statistical analysis  
 118 of main panicle length (**d**), primary branch (**e**) and second branch numbers (**f**), and  
 119 grains per main panicle (**g**) of NP and *ipi7-ko*. Each value represents mean  $\pm$  SD (n =  
 120 10 rice plants). Two-tailed *t*-test, \*\* indicates  $P < 0.01$ ; \* indicates  $P < 0.05$ . NS  
 121 indicates no significant differences between compared pairs.  
 122

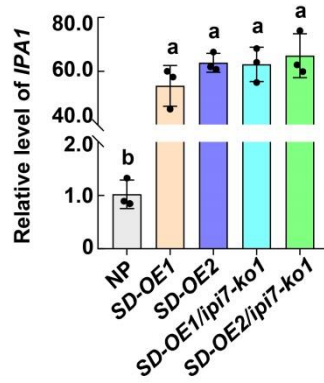

123 **Supplementary Fig. 13. *IPA1* RNA level in transgenic plants.** Confirmation of  
 124 *IPA1(S163D)* overexpression in NP or *ipi7-ko1* background. RNA levels of *IPA1* were  
 125 determined by RT-qPCR; rice *ubiquitin* was used as the reference. Each value  
 126 represents mean  $\pm$  SD (n = 3 independent biological samples). Different letters  
 127 indicate significant differences determined by the Tukey-Kramer test,  $P < 0.05$   
 128 (one-way ANOVA was conducted, followed by two-sided HSD test for multiple  
 129 comparisons). The corresponding  $P$ -values can be found in the Source Data. Source  
 130 data are provided as a Source Data file.

131

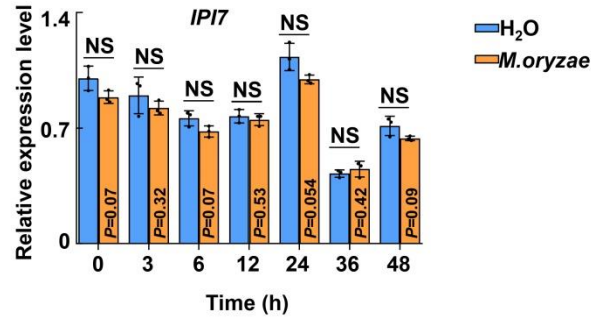

132 **Supplementary Fig. 14** *IPI7* RNA levels upon *M. oryzae* infection or mock  
 133 **treatment.** The transcript levels of *IPI7* were determined by RT-qPCR. Rice *ubiquitin*  
 134 was used as the internal reference. Each value represents mean  $\pm$  SD (n = 3  
 135 independent biological samples, Two-tailed *t*-test). NS indicates no significant  
 136 differences between compared pairs.  
 137



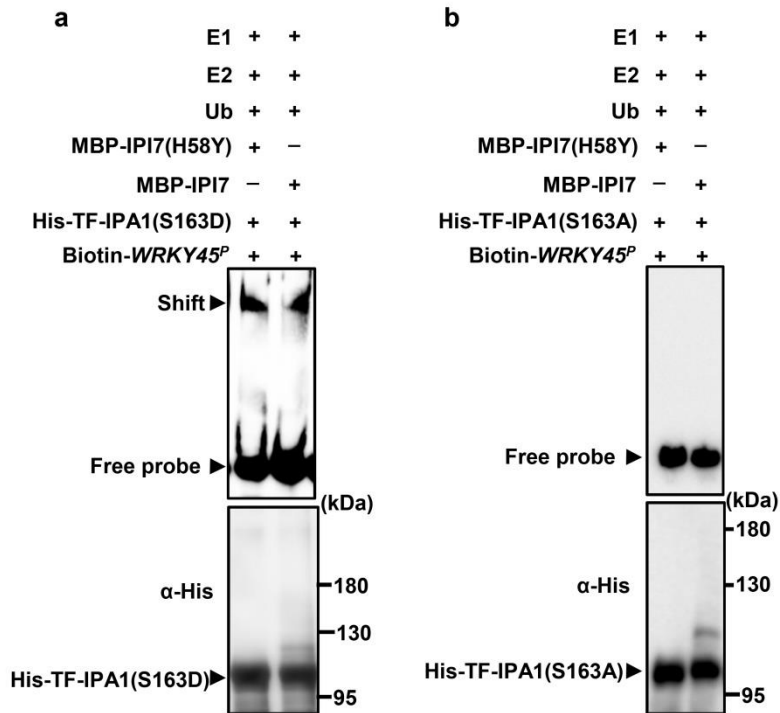

138 **Supplementary Fig. 15 IPI7-mediated ubiquitination does not affect IPA1(S163D)**  
 139 **binding to the *WRKY45* promoter.** DNA binding activities of IPA1(S163D) (**a**) and  
 140 IPA1(S163A) (**b**) were assessed with or without IPI7-mediated ubiquitination. EMSA  
 141 (top) and ubiquitination assays (bottom) were performed to detect the effects of IPI7  
 142 on the DNA binding activity of His-IPA1(S163D) to the *WRKY45* promoter  
 143 (Biotin-*WRKY45<sup>P</sup>*). The presence (+) or absence (-) of components in the reaction  
 144 mixture is indicated.

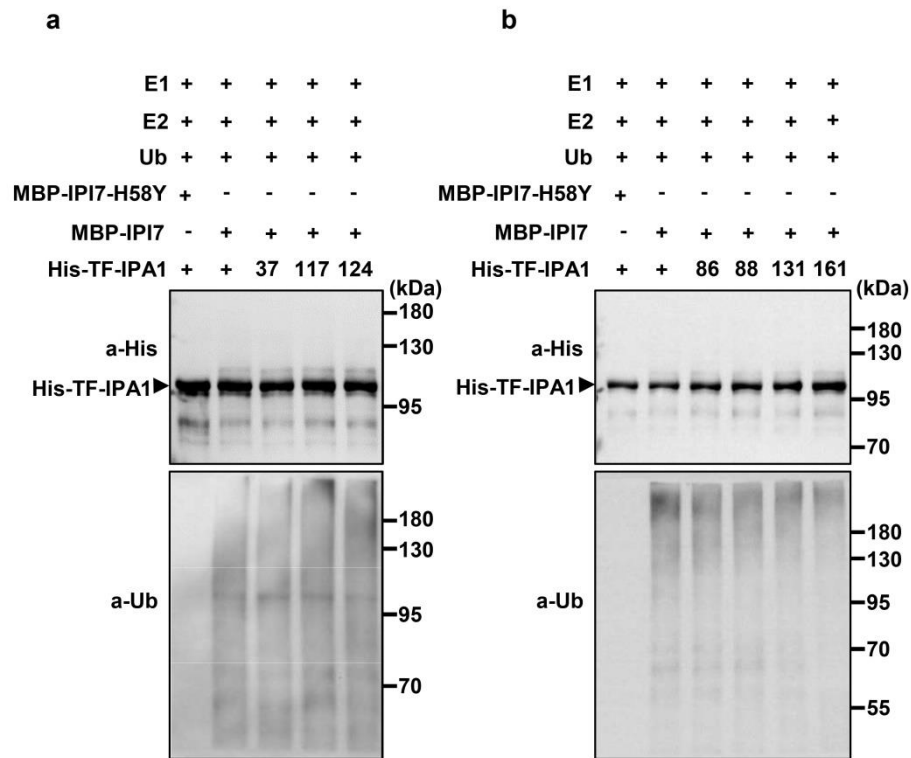

145 **Supplementary Fig. 16. IPI7 promotes ubiquitination of IPA1 lysine mutants *in***  
 146 ***vitro*.** *In vitro* ubiquitination assays were performed for wildtype and mutant IPA1  
 147 proteins with or without MBP-IPI7. MBP-IPI7(H58Y) was used as a negative control.  
 148 The number in the His-TF-IPA1 column represents the IPA1 protein carrying a  
 149 mutation at the indicated number of amino acid (lysine), including (a) IPA1(K37R),  
 150 IPA1(K117R), IPA1(K124R), (b) IPA1(K86R), IPA1(K88R), IPA1(K131R) and  
 151 IPA1(K161R). Immunoblotting was performed with antibodies against His and Ub.

152
