# Supplementary material for: Fine-tuning of IPA1 transactivation activity by E3 ligase IPI7-mediated non-proteolytic K29-ubiquitination during Magnaporthe oryzae infection
Source: PubMed Central journal article supplement — Nat Commun. 2024 Sep 1;15:7608. doi: 10.1038/s41467-024-51962-x (PMC11366762; doi:10.1038/s41467-024-51962-x), 2024-09-01
Supplement: 41467_2024_51962_MOESM3_ESM.pdf [file 41467_2024_51962_MOESM3_ESM.pdf]

## **Description of Additional Supplementary Files**

### **Supplementary Data Legends**

**Supplementary Data 1:** Primers Used in This Study.
